# Supplementary material for: Hematological Composite Scores in Patients with Inflammatory Bowel Disease
Source: MDPI journal article supplement (doi:10.3390/jcm12237248), 2023-11-23
Supplement: s1 [file s1]

Supplementary Table S1. Univariable analysis of the differences between patients with Crohn's disease and ulcerative colitis and controls in hematological count cells and scores.

|                                                    | Controls<br>(n=208) | Chron's disease<br>(n=130) | p*               | Ulcerative colitis<br>(n=67) | p**          |
|----------------------------------------------------|---------------------|----------------------------|------------------|------------------------------|--------------|
| Red blood cells, x10 <sup>6</sup> /mm <sup>3</sup> | 4.76 ± 0.49         | 4.66 ± 0.46                | 0.057            | 4.69 ± 0.50                  | 0.30         |
| Hemoglobin, g/dL                                   | 14.0 ± 1.5          | 14.0 ± 1.5                 | 0.81             | 14.0 ± 1.41                  | 0.81         |
| Hematocrit, %                                      | 42.9 ± 4.1          | 42.6 ± 3.7                 | 0.59             | 42.8 ± 4.1                   | 0.87         |
| Mean corpuscular volume, fL                        | <b>90.3 ± 5.8</b>   | <b>91.2 ± 6.1</b>          | <b>0.017</b>     | <b>91.5 ± 4.5</b>            | <b>0.13</b>  |
| Mean corpuscular hemoglobin, pg                    | <b>29.6 ± 2.5</b>   | <b>30.5 ± 2.8</b>          | <b>0.002</b>     | <b>30.0 ± 2.0</b>            | <b>0.17</b>  |
| Mean corpuscular hemoglobin concentration, g/dl    | <b>32.7 ± 1.2</b>   | <b>30.6 ± 6.4</b>          | <b>&lt;0.001</b> | <b>31.5 ± 4.7</b>            | <b>0.001</b> |
| Leucocytes / mm <sup>3</sup>                       | 7480 ± 1941         | 7142 ± 2157                | 0.14             | <b>6748 ± 1920</b>           | <b>0.008</b> |
| Neutrophils / mm <sup>3</sup>                      | 4154 ± 1504         | 4301 ± 1722                | 0.42             | 3840 ± 1358                  | 0.13         |
| Lymphocytes / mm <sup>3</sup>                      | <b>2427 ± 827</b>   | <b>2010 ± 816</b>          | <b>&lt;0.001</b> | <b>2089 ± 871</b>            | <b>0.004</b> |
| Monocytes / mm <sup>3</sup>                        | 600 ± 171           | 592 ± 273                  | 0.74             | 571 ± 197                    | 0.26         |
| Eosinophils / mm <sup>3</sup>                      | 245 ± 176           | 189 ± 161                  | 0.004            | 209 ± 185                    | 0.15         |
| Basophils / mm <sup>3</sup>                        | 50 ± 26             | 41 ± 23                    | 0.002            | 47 ± 29                      | 0.38         |
| Platelets x10 <sup>3</sup> / mm <sup>3</sup>       | 263 ± 59            | 268 ± 67                   | 0.24             | 269 ± 73                     | 0.38         |
| Mean platelet volume, fL                           | 10.2 ± 0.9          | 10.3 ± 1.0                 | 0.28             | 10.1 ± 1.1                   | 0.42         |
| Composite hematological scores                     |                     |                            |                  |                              |              |
| SIRI x 10e-3                                       | 1.23 ± 1.20         | 1.44 ± 0.81                | 0.12             | 11.21 ± 8.25                 | 0.88         |
| NLR                                                | <b>1.99 ± 1.57</b>  | <b>2.44 ± 1.28</b>         | <b>0.008</b>     | 2.10 ± 1.13                  | 0.61         |
| MLR                                                | 0.29 ± 0.23         | 0.36 ± 0.46                | 0.055            | 0.31 ± 0.14                  | 0.55         |
| PLR                                                | <b>125 ± 79</b>     | <b>160 ± 81</b>            | <b>&lt;0.001</b> | <b>150 ± 78</b>              | <b>0.025</b> |

In this analysis controls is considered the reference category. Significant p values are depicted in bold.

p\* refers to the comparison between Chron's disease and controls, and p\*\* to the comparison between ulcerative colitis and controls.

SIRI: systemic inflammation response index; NLR: neutrophil-to-lymphocyte ratio; PLR: platelet-to-lymphocyte ratio; MLR: monocyte-to-lymphocyte ratio.
